# Supplementary material for: Reproducible strategy for excisional skin-wound-healing studies in mice
Source: Springer Nature journal article supplement (doi:10.1038/s41596-023-00899-4), 2023-11-29
Supplement: MOESM3 [file 41596_2023_899_MOESM3_ESM10.xlsx]

## Sheet: Sheet1
Yampolsky et al. 2023 - Supplementary Data 2
A Source Data for Supplementary figure 1B
group	Mice	Day 0	Day 2	Day 4	Day 6	Day 8	Day 10
Bulge	# Bulge_1	0	0.411629	0.566431	0.628635	0.777204	0.991513
Bulge	# Bulge_2	0	0.383158	0.502226	0.661682	1	1
Bulge	# Bulge_3	0	0.248138	0.270747	0.347713	0.513618	0.903315
Bulge	# Bulge_4	0	-0.0605188	-0.0266835	0.175821	0.484972	0.718091
Bulge	# Bulge_5	0	0.0772636	0.124058	0.170498	0.494103	0.730027
Bulge	# Bulge_6	0	0.277493	0.393891	0.492414	0.732948	0.885305
Bulge	# Bulge_7	0	0.228992	0.344687	0.483789	0.739019	0.934265
Bulge	# Bulge_8	0	0.254865	0.363955	0.466406	0.680137	0.897353
Bulge	# Bulge_9	0	0.0784633	0.245225	0.360106	0.599135	0.84243
Sub-bulge	# Sub_bulge_1	0	0.506174	0.6316	0.710364	0.877491	0.958737
Sub-bulge	# Sub_bulge_2	0	0.506727	0.589581	0.677719	0.87928	0.933339
Sub-bulge	# Sub_bulge_3	0	0.305089	0.334642	0.537939	0.798932	0.974573
Sub-bulge	# Sub_bulge_4	0	0.177199	0.20836	0.527603	0.842693	0.959071
Sub-bulge	# Sub_bulge_5	0	0.486576	0.640147	0.812014	0.924279	0.994874
Sub-bulge	# Sub_bulge_6	0	0.411575	0.458617	0.679795	0.886798	0.994165
Sub-bulge	# Sub_bulge_7	0	0.0831821	0.302588	0.613229	0.935134	1
ttest			0.0997679	0.136089	0.00782246	0.00661198	0.028517
Asterisk					**	**	*
Avg by group
	Group	Day 0	Day 2	Day 4	Day 6	Day 8	Day 10
Avg	Bulge	0	0.211054	0.309393	0.420785	0.669015	0.878033
	Sub-bulge	0	0.353789	0.452219	0.651238	0.877801	0.973537
SE	Bulge	0	0.0509783	0.0609557	0.0582245	0.0557605	0.0334863
	Sub-bulge	0	0.0644328	0.0658434	0.0379311	0.0175821	0.009292
